# Supplementary material for: NPC1 regulates ER contacts with endocytic organelles to mediate cholesterol egress
Source: PubMed Central journal article supplement (PMC6753064; doi:10.1038/s41467-019-12152-2), 2019-09-19
Supplement: 41467_2019_12152_MOESM2_ESM.pdf [file 41467_2019_12152_MOESM2_ESM.pdf]

## Description of Additional Supplementary Files

**File name:** Supplementary Movie 1

**Description:** Tomogram of lysosome-mitochondria contact. Tomogram showing a lysosome pushing into, but not fusing with the mitochondrial membrane
